# Supplementary material
Source: publisher figshare collection journal article supplement (https://acs.figshare.com/ndownloader/files/5103601)
Supplement: Supplementary file 1 [file 5103601]

## Supporting Information

### Stereoselective Synthesis of Spirocyclic Ketones by Nazarov Reaction of 6-(1-Ethoxy-1,3-butadienyl)dihydropyran derivatives

Cristina Prandi,\* Annamaria Deagostino, Paolo Venturello, and Ernesto G. Occhiato\*

EXPERIMENTAL. All solvents were degassed before use in cross-coupling processes. Chromatographic separations were carried out under pressure on silica gel using flash-column techniques; R<sub>f</sub> values refer to TLC carried out on 0.25-mm silica gel plates (Merck F254), with the same eluant indicated for the column chromatography. <sup>1</sup>H NMR spectra were recorded at 400 and 200 MHz, NOESY 1D and 2D experiments at 400 MHz, and <sup>13</sup>C NMR spectra at 100.4 and 50.33 MHz. MS spectra were recorded at an ionizing voltage of 70 eV. THF was distilled from Na/benzophenone. Compounds **1a**,<sup>8</sup> **2a**,<sup>8</sup> **2b**,<sup>6</sup> **3a-d**,<sup>2,3</sup> and **4a-d**,<sup>3</sup> were prepared as reported.

**6-((E)-1-Ethoxy-4-methylpenta-1,3-dienyl)-3,4-dihydro-2H-pyran (4e).** To a solution of crude **3a** (232 mg, 1.0 mmol) in THF (12 mL) were added, under a nitrogen atmosphere, (Ph<sub>3</sub>P)<sub>2</sub>PdCl<sub>2</sub> (35 mg, 0.05 mmol), boronate **2a** (252 mg, 1.0 mmol), and a 2 M aqueous K<sub>2</sub>CO<sub>3</sub> solution (1 mL). The mixture was stirred for 3 h at room temperature. Water (25 mL) was then added, the mixture extracted with diethyl ether (3 x 20 mL) and dried over anhydrous sodium sulfate. Evaporation of the solvent afforded a yellow oil which was purified by chromatography (EtOAc-petroleum ether, 1:6, 1% Et<sub>3</sub>N, R<sub>f</sub> 0.80) to give **4e** (110 mg, 53%) as a colorless oil: <sup>1</sup>H NMR (200 MHz, CDCl<sub>3</sub>): 6.20 (d, *J* = 9.4 Hz, 1 H), 5.65 (d, *J* = 9.4 Hz, 1 H), 5.15 (t, *J* = 2.3 Hz, 1 H), 4.14 (t, *J* = 6.0 Hz, 2 H), 3.85 (q, *J* = 6.5 Hz, 2 H), 2.20 (m, 1 H), 1.95 (m, 1 H), 1.85 (s, 3 H), 1.75 (s, 3 H), 1.26 (t, *J* = 6.5 Hz, 3 H), 0.95 (m, 2 H); <sup>13</sup>C NMR (50.33 MHz, CDCl<sub>3</sub>): 150.0 (s), 148.7 (s), 131.3 (s), 120.4 (d), 102.7 (d, 2 C), 66.1 (t), 61.3 (t), 26.4 (t), 22.1 (q), 20.4 (q), 18.0 (t), 14.7 (q); MS *m/z* 208 (M<sup>+</sup>,

10<sup>S10</sup>), 193 (37), 179 (42), 55 (40). Anal. Calcd for C<sub>13</sub>H<sub>20</sub>O<sub>2</sub>: C, 74.96; H, 9.68;. Found C, 74.79; H, 9.73.

**6-((E)-1-Ethoxy-4-methylpenta-1,3-dienyl)-3,4-dihydro-4-methyl-2H-pyran (4f)**: prepared as described for **4e** starting from 5,6-dihydro-4-methyl-4*H*-pyran-2-yl trifluoromethanesulfonate **3c** (230 mg, 1 mmol). Obtained 162 mg (73% yield) after chromatography (EtOAc-petroleum ether, 5:95). <sup>1</sup>H NMR (200 MHz, CDCl<sub>3</sub>): 6.21 (dq, *J* = 10.9, 1.5 Hz, 1 H), 5.62 (d, *J* = 10.9 Hz, 1 H), 5.01 (d, *J* = 2.9 Hz, 1 H), 4.10 (m, 2 H), 3.83 (q, *J* = 7.0 Hz, 2 H), 2.12 (m, 1 H), 1.78 (s, 3 H), 1.72 (s, 3 H), 1.36 (m, 2 H), 1.33 (t, *J* = 7.0 Hz, 3 H), 1.09 (d, *J* = 6.9 Hz, 3 H); <sup>13</sup>C NMR (50.33 MHz, CDCl<sub>3</sub>): 149.9 (s), 147.7 (s), 131.3 (s), 120.5 (d), 109.1 (d), 103.0 (d), 64.2 (t), 63.7 (t), 30.5 (d), 26.4 (q), 25.8 (q), 21.8 (t), 17.9 (q), 14.7 (q); MS *m/z* 222 (M<sup>+</sup>, 48), 207 (17), 121 (32), 55 (100). Anal. Calcd for C<sub>14</sub>H<sub>22</sub>O<sub>2</sub>: C, 75.63; H, 9.97;. Found C, 75.79; H, 9.83.

**6-((E)-1-Ethoxy-4-methylpenta-1,3-dienyl)-3,4-dihydro-2-methyl-2H-pyran (4g)**: prepared as described for **4e** starting from 5,6-dihydro-6-methyl-4*H*-pyran-2-yl trifluoromethanesulfonate **3b** (230 mg, 1 mmol). Obtained 166 mg (75% yield) after chromatography (EtOAc-petroleum ether, 5:95). <sup>1</sup>H NMR (200 MHz, CDCl<sub>3</sub>): 6.25 (dq, *J* = 11.0, 1.5 Hz, 1 H), 5.60 (d, *J* = 11.0 Hz, 1 H), 5.15 (t, *J* = 2.7 Hz, 1 H), 4.10 (m, 1 H), 3.80 (q, *J* = 7.0 Hz, 2 H), 2.22 (m, 2 H), 1.83 (s, 3 H), 1.70 (s, 3 H), 1.45 (d, *J* = 6.5 Hz, 3 H), 1.25 (t, *J* = 7.0 Hz, 3 H), 0.99 (m, 2 H); <sup>13</sup>C NMR (50.33 MHz, CDCl<sub>3</sub>): 149.7 (s), 148.8 (s), 131.2 (s), 120.5 (d), 102.9 (d), 101.8 (d), 71.8 (d), 63.8 (t), 28.9 (t), 26.4 (q), 21.00 (q), 20.7 (t), 17.9 (q), 14.8 (q); MS *m/z* 222 (M<sup>+</sup>, 35), 207 (27), 121 (42), 55 (100). Anal. Calcd for C<sub>14</sub>H<sub>22</sub>O<sub>2</sub>: C, 75.63; H, 9.97;. Found C, 75.86; H, 9.78.

**(1E, 3E)-6-(1-Ethoxyhexa-1,3-dienyl)-2-methyl-3,4-dihydro-2H-pyran (4h)**: prepared as described for **4e** starting from 5,6-dihydro-6-methyl-4*H*-pyran-2-yl trifluoromethanesulfonate **3b** (230 mg, 1 mmol) and **2b** (238 mg, 1 mmol). Obtained 162 mg (73% yield) after chromatography (EtOAc-petroleum ether, 1:49). <sup>1</sup>H NMR (200 MHz, CDCl<sub>3</sub>): 6.44 (dd, *J* = 14.5, 11.0 Hz, 1 H), 5.65 (d, *J* = 11.0 Hz, 1 H), 5.45 (m, 1 H), 5.15 (t, *J* = 3.2, 1 H), 4.00 (m, 1 H), 3.80 (q, *J* = 7.0 Hz,

2 H), 2.20 (m, 4 H), 1.45-1.35 (m, 5 H), 1.25 (d,  $J = 6.5$  Hz, 3 H), 0.95 (t,  $J = 7.0$  Hz, 3 H);  $^{13}\text{C}$  NMR (50.33 MHz,  $\text{CDCl}_3$ ): 151.7 (s), 148.5 (s), 132.5 (d), 125.3 (d), 106.1 (d), 102.4 (d), 71.8 (d), 63.6 (t), 29.9 (t), 22.9 (t), 21.9 (q), 21.6 (t), 16.5 (q), 15.7 (q); MS  $m/z$  222 ( $\text{M}^+$ , 78), 193 (32), 139 (35), 123 (44), 55 (100). Anal. Calcd for  $\text{C}_{14}\text{H}_{22}\text{O}_2$ : C, 75.63; H, 9.97; Found C, 75.45; H, 9.65.

**7-((*E*)-1-Ethoxy-4-methylpenta-1,3-dienyl)-2,3,4,5-tetrahydrooxepine (4i):** prepared as described for **4e** starting from 5-trifluoro-methanesulfonic acid 4,5,6,7-tetrahydro-oxepin-2-yl ester **3e** (246 mg, 1 mmol). Obtained 180 mg (81% yield) after chromatography (EtOAc-petroleum ether, 1:9).  $^1\text{H}$  NMR (200 MHz,  $\text{CDCl}_3$ ): 6.23 (dq,  $J = 11.0, 1.5$  Hz, 1 H), 5.55 (d,  $J = 11.0$  Hz, 1 H), 5.44 (t,  $J = 6.1$  Hz, 1 H), 4.00 (t,  $J = 5.3$  Hz, 2 H), 3.80 (q,  $J = 6.9$  Hz, 2 H), 2.30 (m, 2 H), 1.78 (s, 3 H), 1.72 (s, 3 H), 1.33 (t,  $J = 7.0$  Hz, 3 H), 0.88-0.85 (m, 4 H);  $^{13}\text{C}$  NMR (50.33 MHz,  $\text{CDCl}_3$ ): 151.3 (s), 151.3 (s), 131.6 (s), 120.9 (d), 114.0 (d), 103.3 (d), 72.7 (t), 64.1 (t), 32.1 (q), 28.8 (t), 26.6 (q), 25.8 (t), 18.3 (t), 15.2 (q); MS  $m/z$  222 ( $\text{M}^+$ , 100), 207 (42), 193 (35), 95 (24), 55 (48). Anal. Calcd for  $\text{C}_{14}\text{H}_{22}\text{O}_2$ : C, 75.63; H, 9.97; Found C, 75.44; H, 9.69.

**7-((*E*)-1-Ethoxy-4-methylpenta-1,3-dienyl)-4-ethyl-2,3,4,5-tetrahydrooxepine (4l):** prepared as described for **4e** starting from trifluoromethanesulfonic acid 5-ethyl-4,5,6,7-tetrahydro-oxepin-2-yl ester **3f** (274 mg, 1 mmol). Obtained 146 mg (58% yield) after chromatography (EtOAc-petroleum ether, 1:49).  $^1\text{H}$  NMR (200 MHz,  $\text{CDCl}_3$ ): 6.25 (dq,  $J = 10.5, 1.5$  Hz, 1 H), 5.60 (d,  $J = 10.5$  Hz, 1 H), 5.40 (t,  $J = 6.0$  Hz, 1 H), 4.25 (ddd,  $J = 8.5, 5.5, 1.5$  Hz, 1 H), 3.90 (m, 1 H), 3.80 (q,  $J = 7.0$  Hz, 2 H), 2.20 (m, 3 H), 1.85 (s, 3 H), 1.78 (s, 3 H), 1.55 (m, 2 H), 1.45 (m, 2 H), 1.35 (t,  $J = 7.0$  Hz, 3 H), 0.95 (t,  $J = 7.0$  Hz, 3 H);  $^{13}\text{C}$  NMR (50.33 MHz,  $\text{CDCl}_3$ ): 154.3 (s), 150.5 (s), 131.2 (s), 120.6 (d), 120.0 (d), 103.0 (d), 71.1 (t), 63.8 (t), 37.9 (q), 37.5 (t), 31.8 (q), 29.4 (d), 26.5 (t), 17.9 (t), 14.8 (q), 11.6 (q); MS  $m/z$  250 ( $\text{M}^+$ , 100), 235 (43), 221 (35), 179 (24), 55 (56). Anal. Calcd for  $\text{C}_{16}\text{H}_{26}\text{O}_2$ : C, 76.75; H, 10.47; Found C, 76.89; H, 10.35.

**4,4-Dimethyl-6-oxaspiro[4.5]dec-2-en-1-one (5e):** Amberlyst 15 (2.3 mequiv/g, 18 mg) was added to a solution of **4e** (104 mg, 0.5 mmol) in anhydrous DCM (5 mL) under argon atmosphere, and the resulting mixture was stirred at room temperature. The reaction was monitored by TLC:

after 8 h the resin was filtered off through a short pad of NaHCO<sub>3</sub> and the solution concentrated under vacuum. Crude products were purified by flash chromatography (Et<sub>2</sub>O-petroleum ether, 1:1, 0.5% Et<sub>3</sub>N, R<sub>f</sub> 0.7) to give pure **5e** (65 mg, 72%). <sup>1</sup>H NMR (200 MHz, CDCl<sub>3</sub>): δ 7.35 (d, *J* = 6.0 Hz, 1 H), 5.95 (d, *J* = 6.0 Hz, 1 H), 4.10 (m, 1 H), 3.71 (m, 1 H), 2.27 (m, 1 H), 1.78-1.65 (m, 4 H), 1.25 (m, 1 H), 1.23 (s, 3 H), 1.11 (s, 3 H); <sup>13</sup>C NMR (CDCl<sub>3</sub>): 209.2 (s), 169.5 (d), 128.1 (d), 80.2 (s), 63.9 (t), 48.1 (s), 26.9 (t), 25.3 (t), 24.8 (t), 22.8 (q), 18.7 (q); MS *m/z* 180 (M<sup>+</sup>, 30), 165 (100), 109 (35), 55 (23) Anal. Calcd for C<sub>11</sub>H<sub>16</sub>O<sub>2</sub>: C, 73.30; H, 8.95; Found C, 73.65; H, 8.81.

**4,4,7-Trimethyl-6-oxaspiro[4.5]dec-2-en-1-one (5f+6f)**: prepared as described for **5e** starting from **4f** (135 mg, 0.6 mmol) after 6 h at r.t. Crude products were purified by flash chromatography (Et<sub>2</sub>O-petroleum ether, 1:1, 0.5% Et<sub>3</sub>N, R<sub>f</sub> 0.76) to give **5f+6f** (86 mg, 74%). <sup>1</sup>H NMR (200 MHz, CDCl<sub>3</sub>): δ 7.25 (d, *J* = 6.2 Hz, 2 H), 6.00 (d, *J* = 6.2 Hz, 1 H), 5.95 (d, *J* = 6.2 Hz, 1 H), 4.02 (m, 2 H), 3.71 (m, 1 H), 3.35 (m, 1 H), 2.03 (m, 2 H), 1.98-1.94 (m, 6 H), 1.45 (s, 6 H), 1.28 (m, 2 H), 1.25 (s, 6 H), 0.94 (d, *J* = 6.4 Hz, 3 H), 0.91 (d, *J* = 6.4 Hz, 3 H); <sup>13</sup>C NMR (CDCl<sub>3</sub>): 209.2 (s), 208.9 (s), 171.9 (d), 171.4 (d), 127.5 (d), 126.8 (d), 85.5 (s), 84.4 (s), 64.8 (t), 64.6 (t), 48.9 (s), 48.5 (s), 38.9 (t), 38.7 (t), 33.4 (t), 33.2 (t), 26.6 (d), 26.4 (d), 26.3 (q), 26.1 (q), 25.6 (q), 25.1 (q), 22.7 (q), 22.3 (q); MS *m/z* 194 (M<sup>+</sup>, 26), 125 (21), 109 (41), 55 (16).

**4,4,7-Trimethyl-6-oxaspiro[4.5]dec-2-en-1-one (5g)**: prepared as described for **5e** starting from **4g** (222 mg, 1 mmol). The reaction was stopped after 4 h at room temperature. Crude products were purified by flash chromatography (Et<sub>2</sub>O-petroleum ether, 1:1, 0.5% Et<sub>3</sub>N, R<sub>f</sub> 0.65) to give pure **5g** (112 mg, 58%) as white crystals mp 107-109 °C. <sup>1</sup>H NMR (200 MHz, CDCl<sub>3</sub>): δ 7.25 (d, *J* = 6.2 Hz, 1 H), 6.00 (d, *J* = 6.2 Hz, 1 H), 3.69 (dq, *J* = 11.35, 6.2, 2.2 Hz, 1 H), 1.80 (m, 1 H), 1.68-1.62 (m, 3 H), 1.43 (s, 3 H), 1.20 (d, *J* = 6.2 Hz, 3 H), 1.19 (s, 3 H); <sup>13</sup>C NMR (CDCl<sub>3</sub>): 209.4 (s), 171.2 (d), 127.5 (d), 84.6 (s), 69.6 (d), 49.0 (s), 31.8 (t), 29.9 (t), 26.5 (q), 24.8 (q), 22.1 (q), 20.3 (t); MS *m/z* 194 (M<sup>+</sup>, 16), 179 (100), 136 (65), 109 (51), 55 (20) Anal. Calcd for C<sub>12</sub>H<sub>18</sub>O<sub>2</sub>: C, 74.19; H, 9.34; Found C, 74.85; H, 9.55

**4-Ethyl-7-methyl-6-oxaspiro[4.5]dec-2-en-1-one (5h):** prepared as described for **5e** starting from **4h** (280 mg, 1.26 mmol). The reaction was stopped after 8 h at room temperature. Crude products were purified by flash chromatography (Et<sub>2</sub>O-petroleum ether, 1:1, 0.5% Et<sub>3</sub>N, *R<sub>f</sub>* 0.65) to give pure **5h** (162 mg, 66%). <sup>1</sup>H NMR (200 MHz, CDCl<sub>3</sub>): δ 7.78 (dd, *J* = 6.2, 4.1 Hz, 1 H), 6.21 (dd, *J* = 6.2, 1.6 Hz, 1 H), 3.70 (m, 1 H), 2.90 (m, 1 H), 2.13-2.01 (m, 1 H), 1.85-1.78 (m, 2 H), 1.63-1.59 (m, 2 H), 1.45-1.35 (m, 3 H), 1.16 (d, *J* = 5.5 Hz, 3 H), 1.12 (t, *J* = 6.5 Hz, 3 H); <sup>13</sup>C NMR (CDCl<sub>3</sub>): 207.1 (s), 165.8 (d), 128.2 (d), 80.3 (s), 69.9 (t), 52.1 (d), 32.2 (t), 25.0 (t), 24.4 (t), 22.2 (t), 20.2 (q), 11.9 (q); MS *m/z* 194 (M<sup>+</sup>, 13), 176 (100), 133 (90), 95 (77), 55 (87). Anal. Calcd for C<sub>12</sub>H<sub>18</sub>O<sub>2</sub>: C, 74.19; H, 9.34; Found C, 74.66; H, 9.48.

**4,4-Dimethyl-6-oxaspiro[4.6]undec-2-en-1-one (5i):** prepared as described for **5e** starting from **4i** (120 mg, 0.54 mmol). The reaction was stopped after 6 h at room temperature.. Crude products were purified by flash chromatography (Et<sub>2</sub>O-petroleum ether, 1:1, 0.5% Et<sub>3</sub>N, *R<sub>f</sub>* 0.35) to give pure **5i** (86 mg, 82%). <sup>1</sup>H NMR (200 MHz, CDCl<sub>3</sub>): δ 7.44 (d, *J* = 6.1 Hz, 1 H), 6.09 (d, *J* = 6.1 Hz, 1 H), 3.61 (t, *J* = 6.52 Hz, 2 H), 1.65 (m, 2 H), 1.58-1.51 (m, 6 H), 1.18 (s, 3 H), 1.08 (s, 3 H); <sup>13</sup>C NMR (CDCl<sub>3</sub>): 211.0 (s), 171.0 (d), 127.5 (d), 83.1 (s), 62.7 (t), 47.8 (s), 36.9 (t), 32.4 (t), 27.2 (t), 26.1 (q), 23.3 (q), 20.8 (t); MS *m/z* 194 (M<sup>+</sup>, 44), 179 (100), 122 (60), 109 (55), 55 (71) Anal. Calcd for C<sub>12</sub>H<sub>18</sub>O<sub>2</sub>: C, 74.18; H, 9.34; Found C, 74.25; H, 9.39.

**9-Ethyl-4,4-dimethyl-6-oxaspiro[4.6]undec-2-en-1-one (5l):** prepared as described for **5e** starting from **4l** (146 mg, 0.58 mmol). The reaction was stopped after 3 h at room temperature. Crude products were purified by flash chromatography (Et<sub>2</sub>O-petroleum ether, 1:1, 0.5% Et<sub>3</sub>N, *R<sub>f</sub>* 0.55) to give pure **5l** (41 mg, 32%). <sup>1</sup>H NMR (200 MHz, CDCl<sub>3</sub>): δ 7.35 (d, *J* = 6.2 Hz, 1 H), 6.00 (d, *J* = 6.2 Hz, 1 H), 3.98 (dt, *J* = 11.5, 2.5 Hz, 1 H), 3.65 (td, *J* = 11.5, 2.5 Hz, 1 H), 1.95-1.90 (m, 1 H), 1.85-1.80 (m, 2 H), 1.35-1.25 (m, 6 H), 1.21 (s, 3 H), 1.15 (s, 3 H), 0.93 (t, *J* = 6.5 Hz, 3 H); <sup>13</sup>C NMR (CDCl<sub>3</sub>): 208.3 (s), 170.1 (d), 127.4 (d), 86.2 (s), 64.8 (t), 48.2 (s), 42.82 (d), 37.6 (t), 30.6 (t), 29.6 (t), 29.4 (t), 27.1 (q), 24.0 (q), 11.9 (q); MS *m/z* 222 (M<sup>+</sup>, 41), 207 (100), 122 (45), 109 (15), 55 (54) Anal. Calcd for C<sub>14</sub>H<sub>22</sub>O<sub>2</sub>: C, 75.63; H, 9.97; Found C, 75.45; H, 9.85.

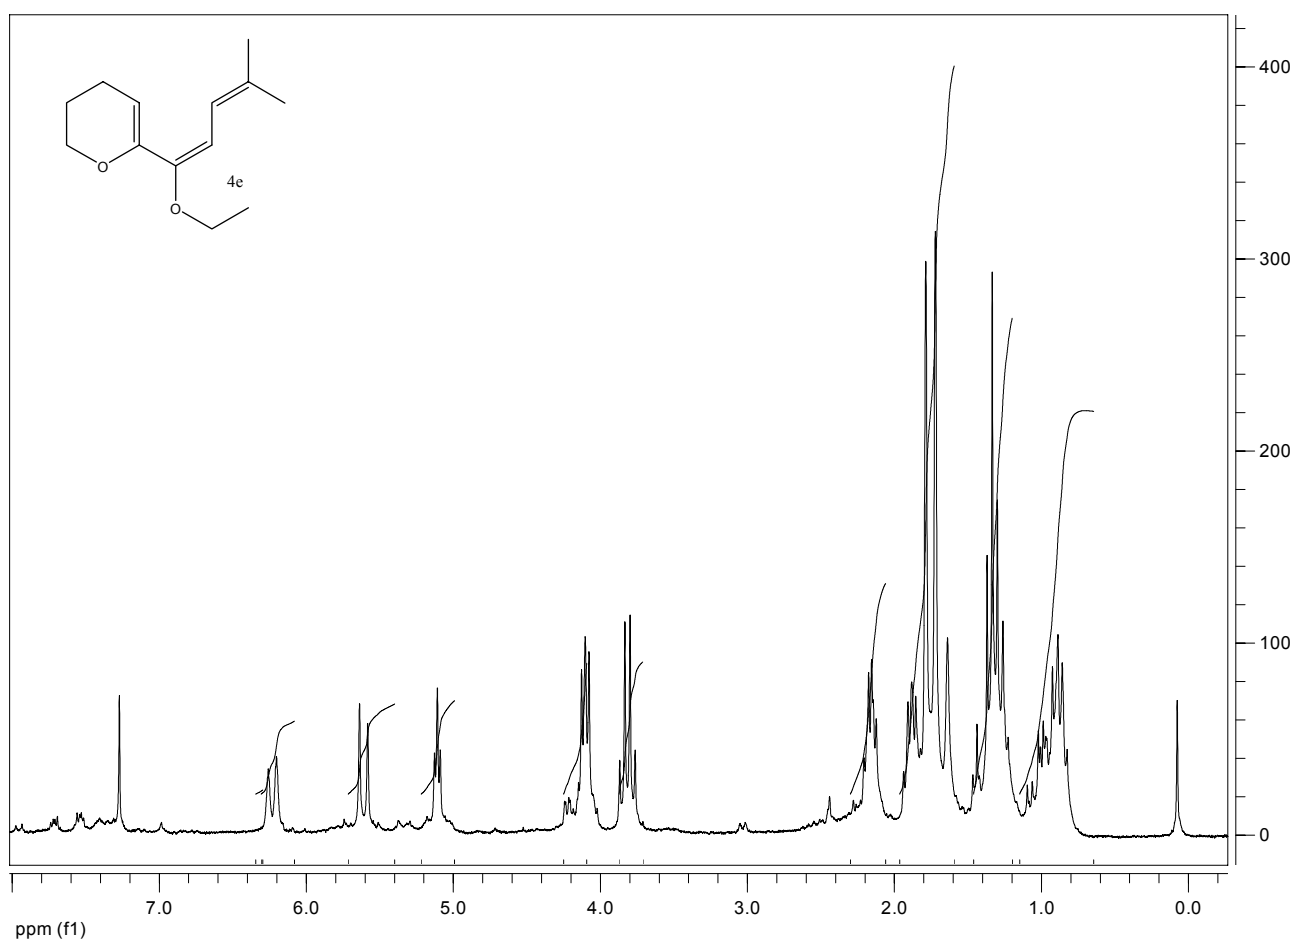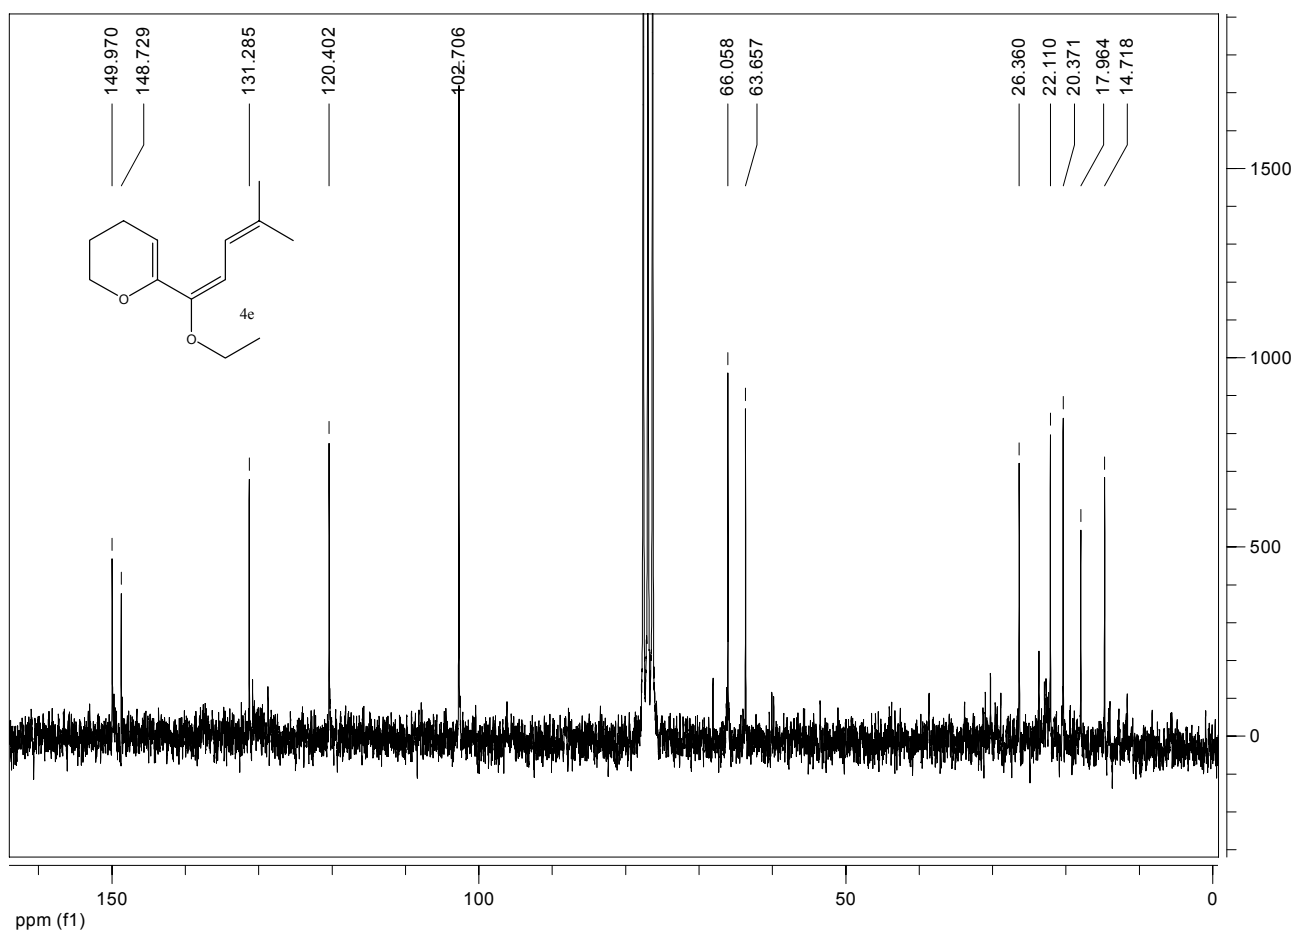

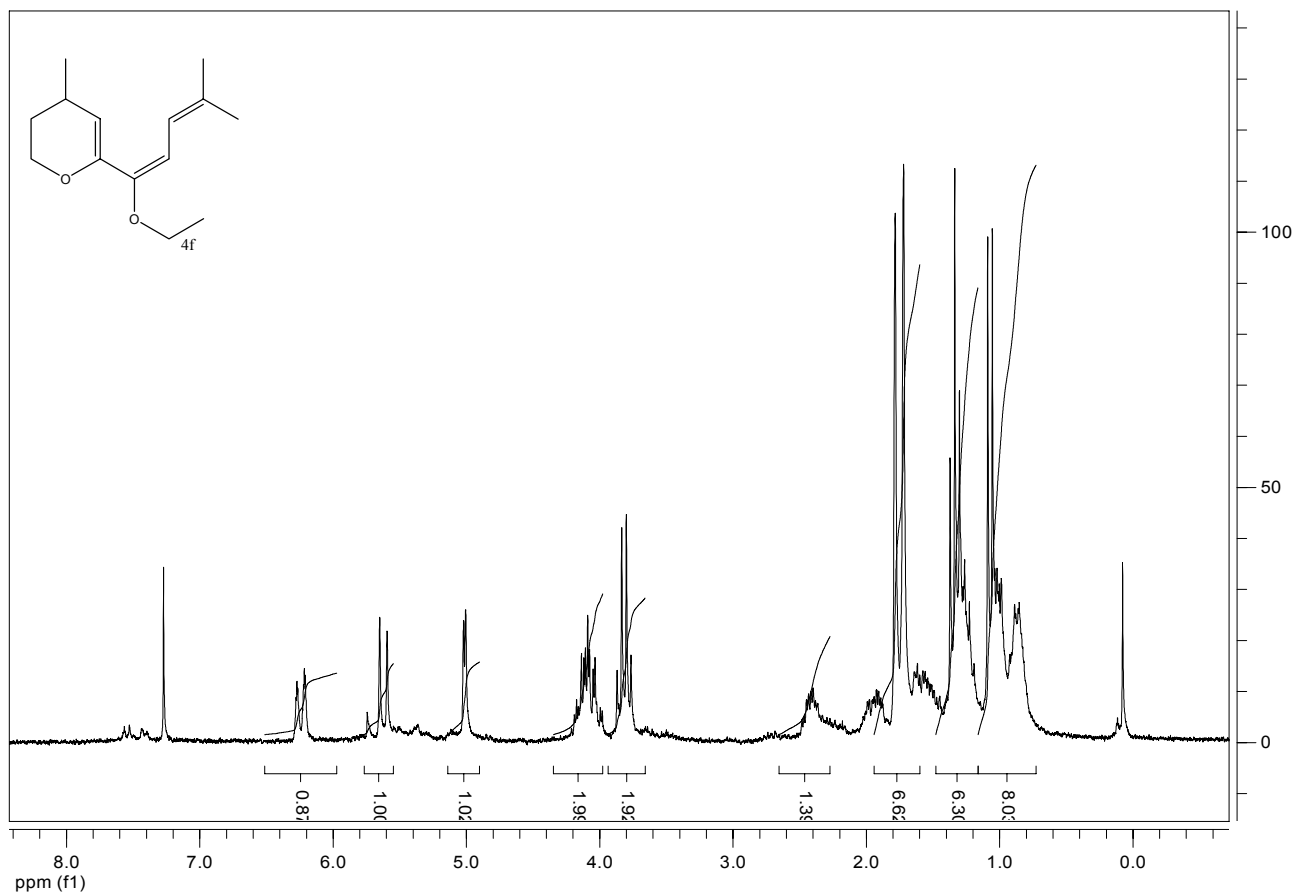

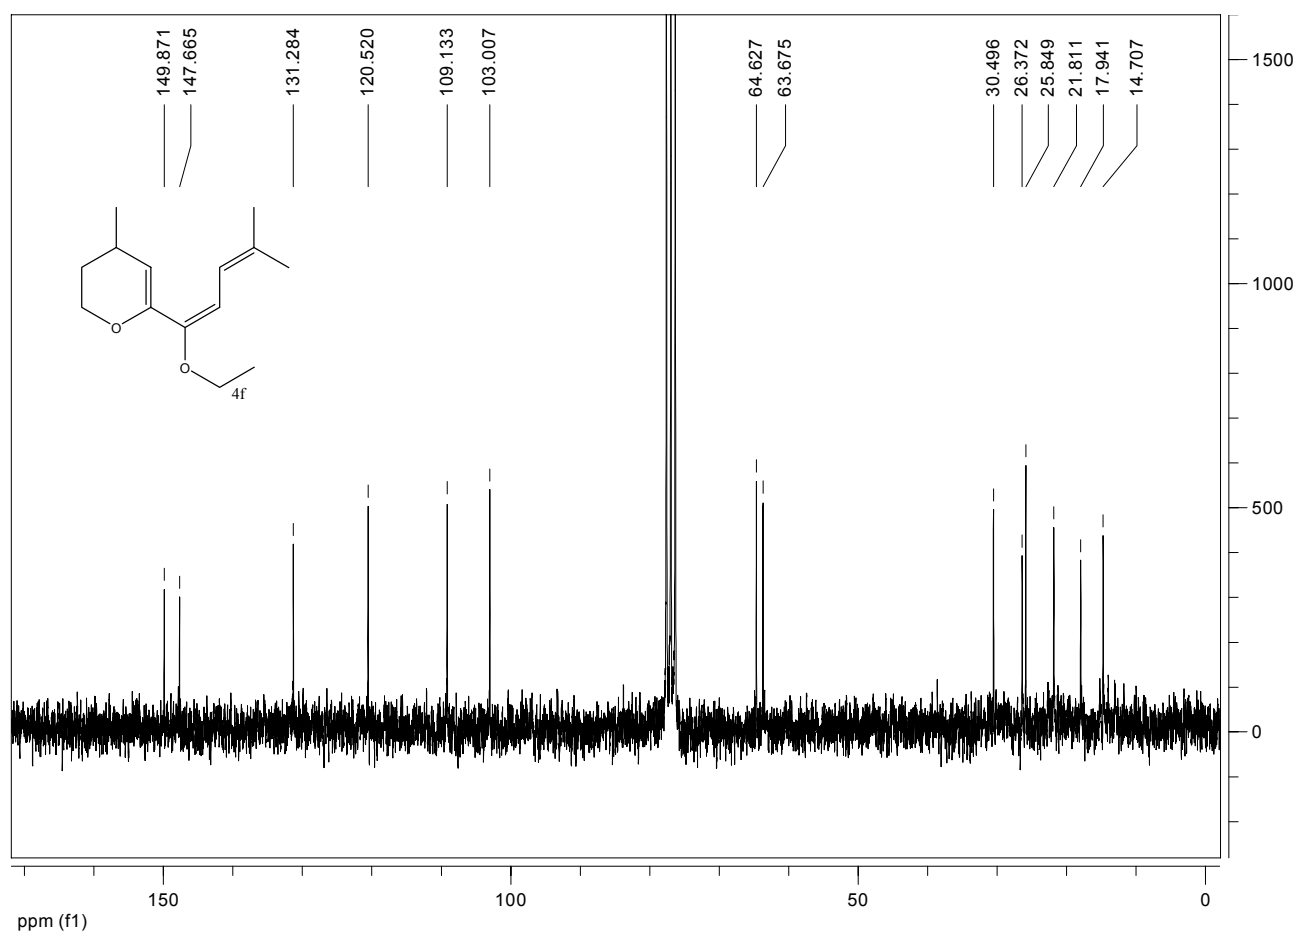



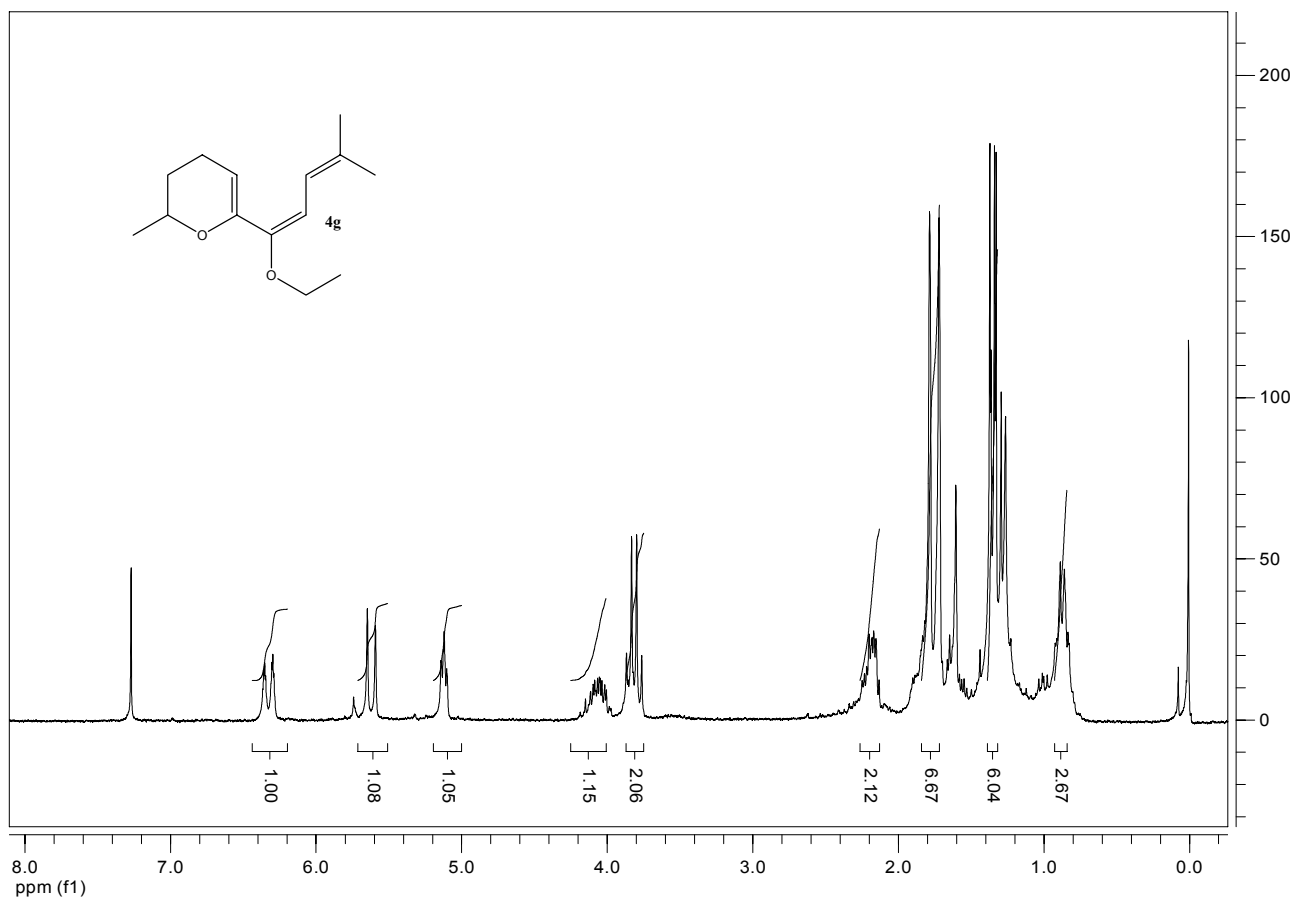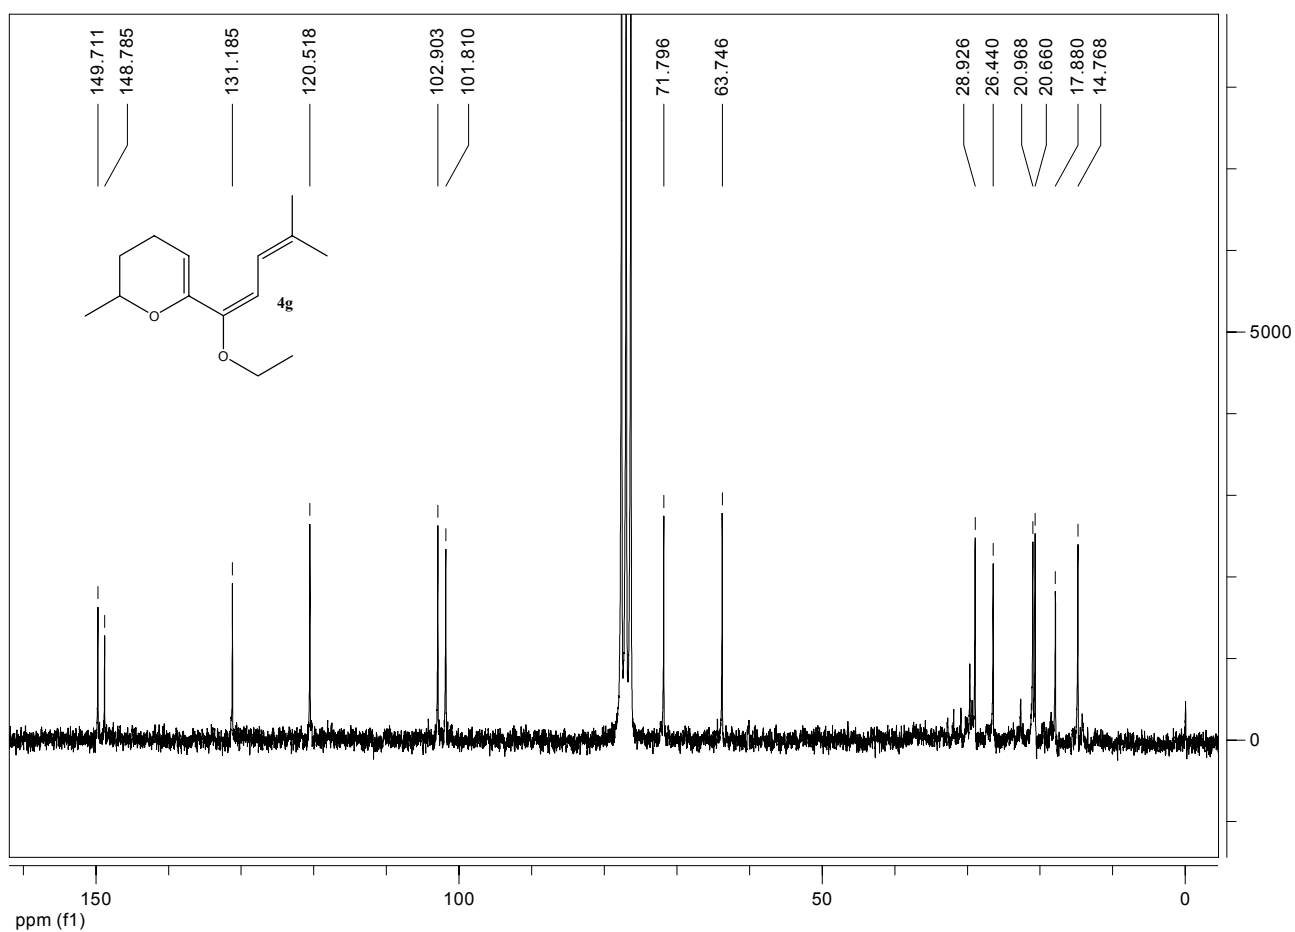

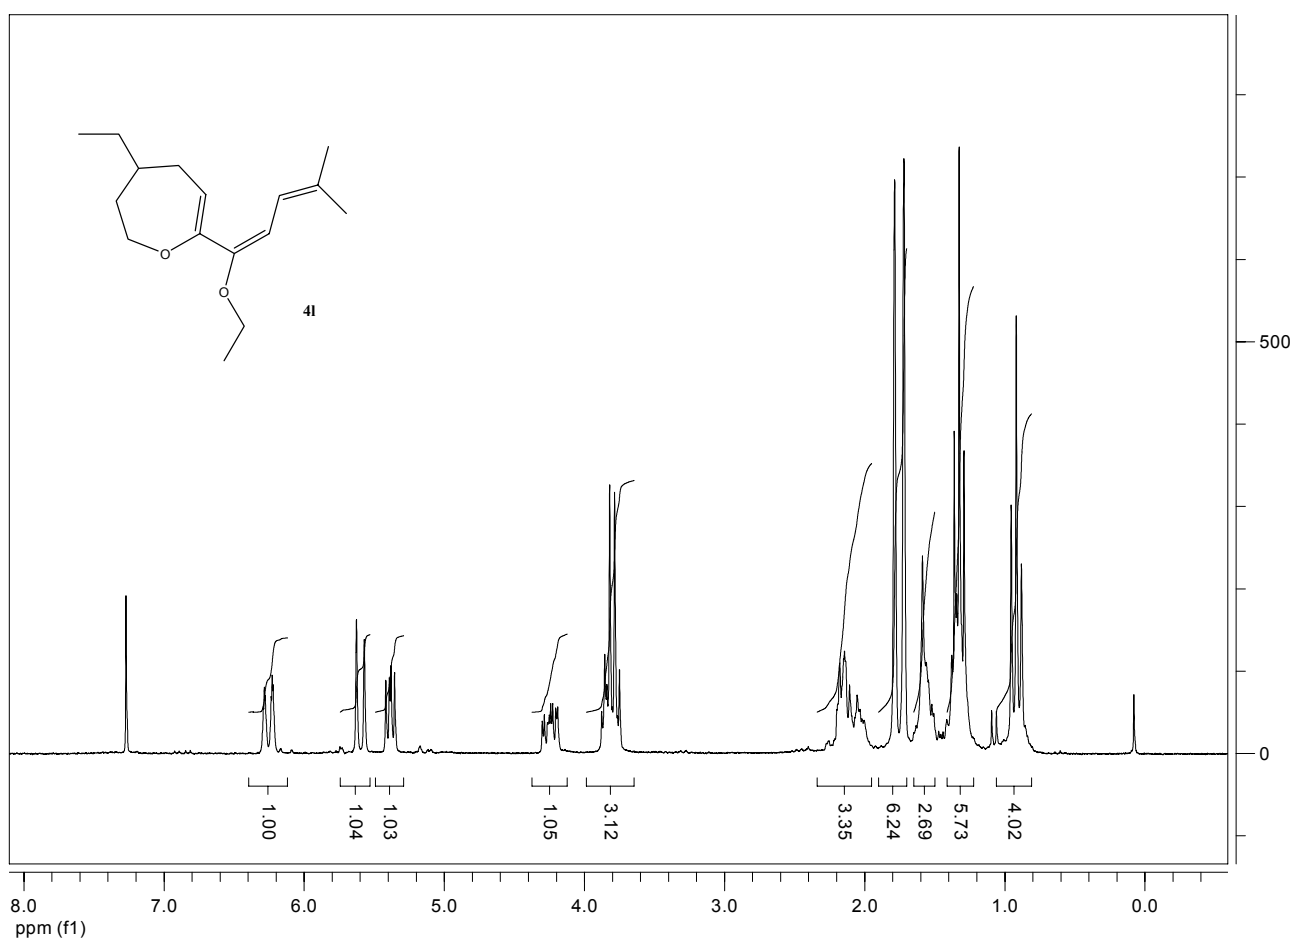

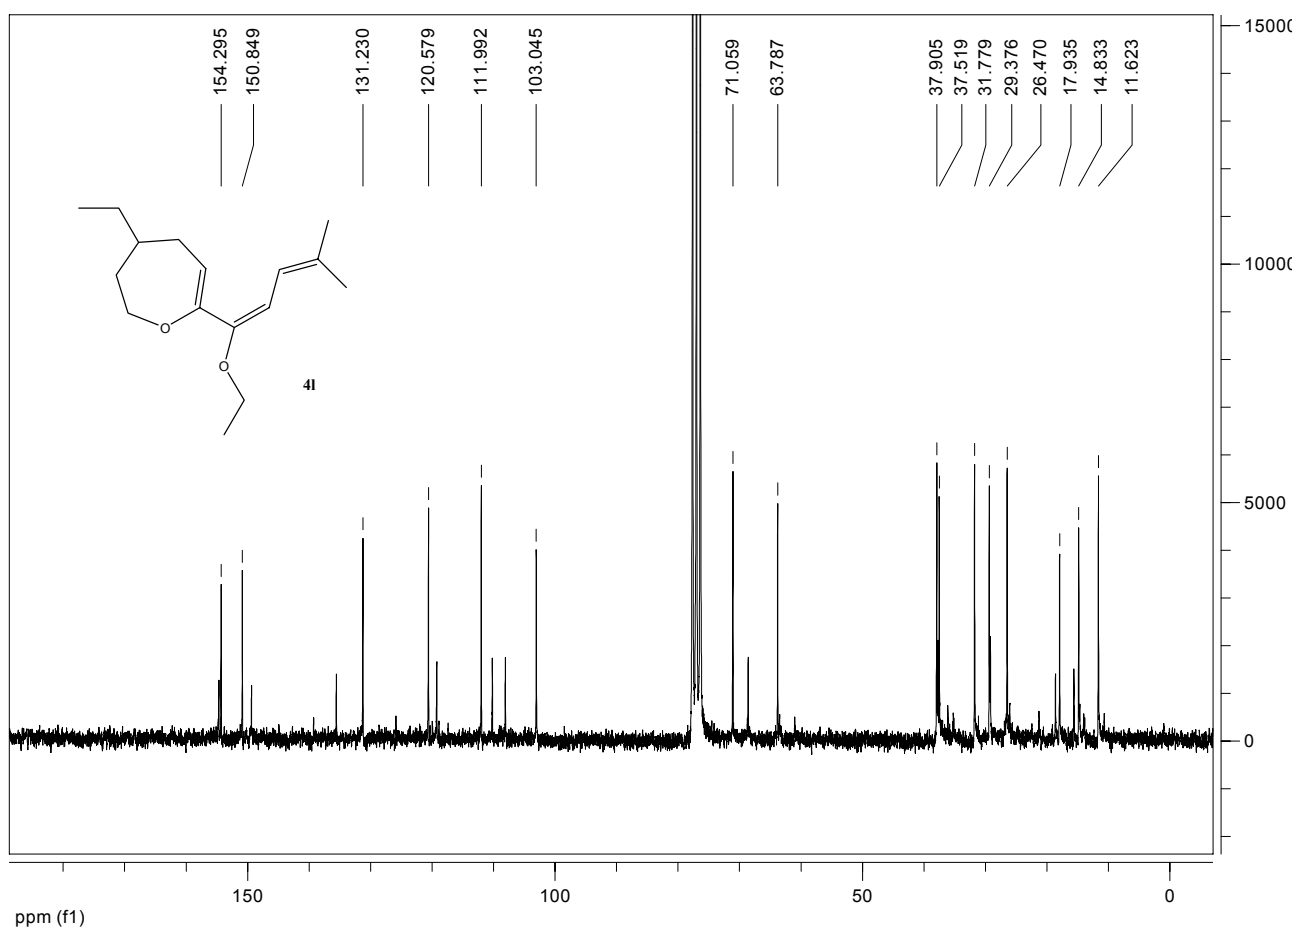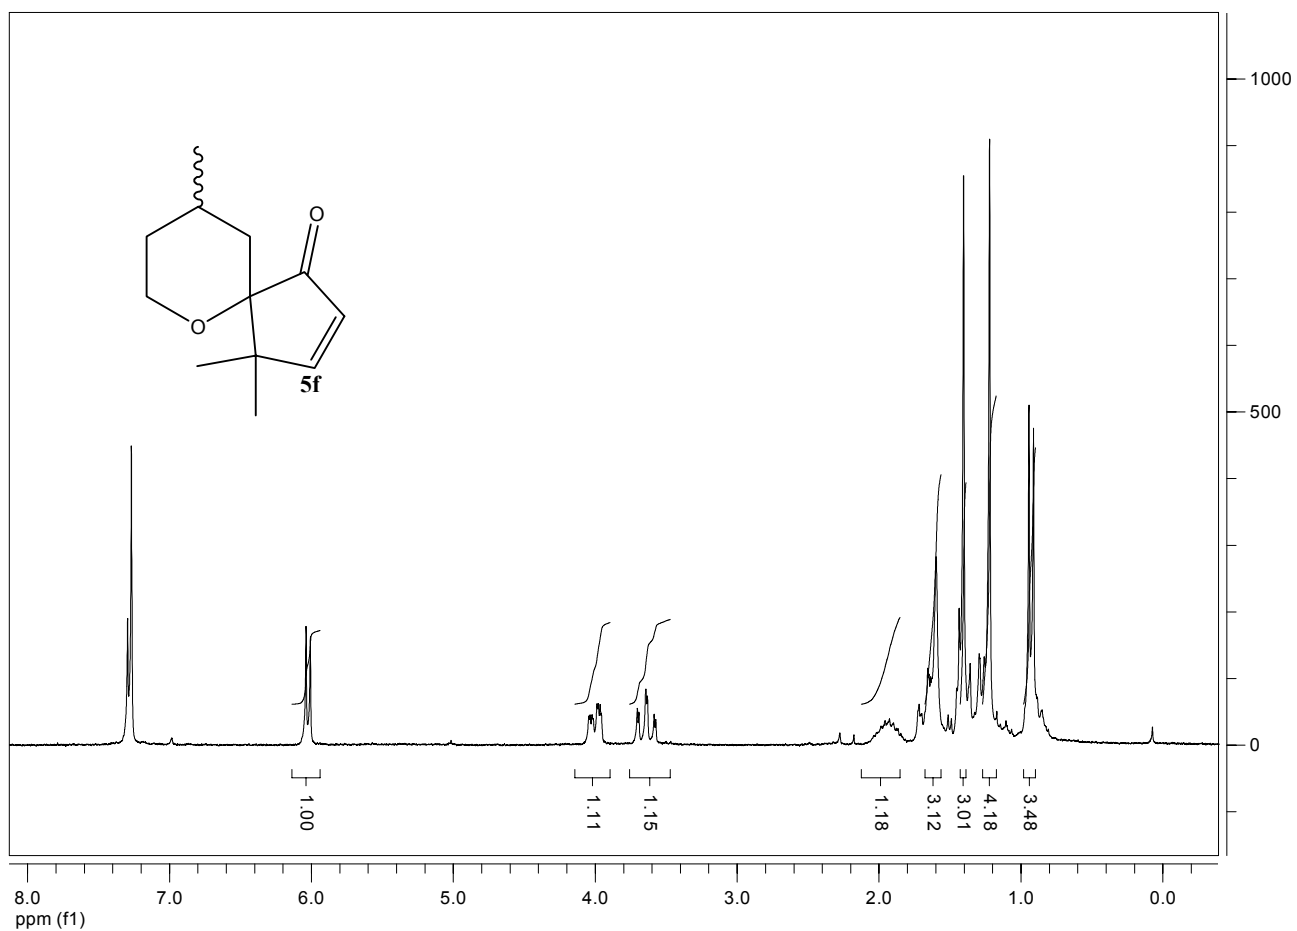

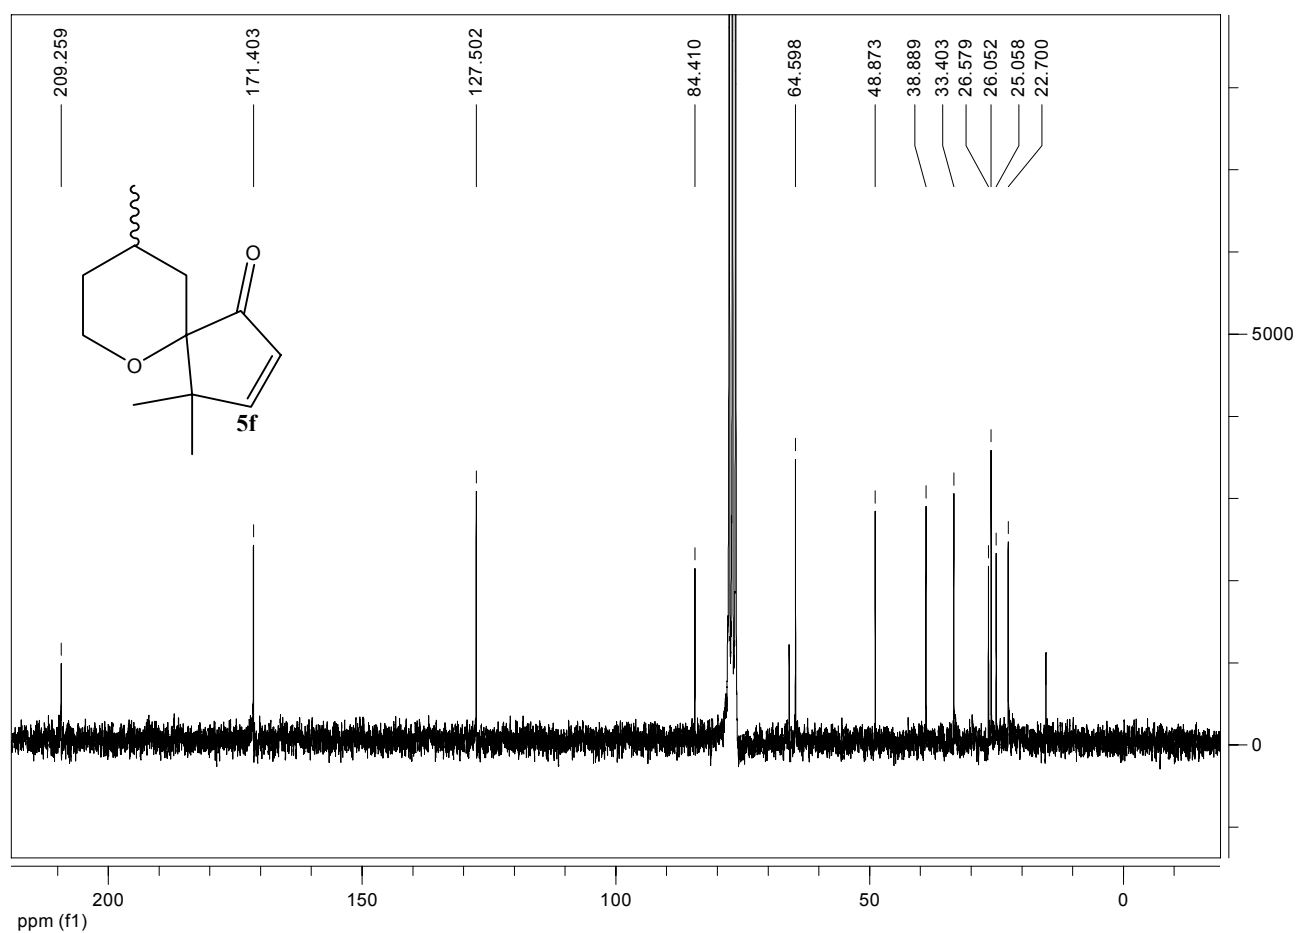

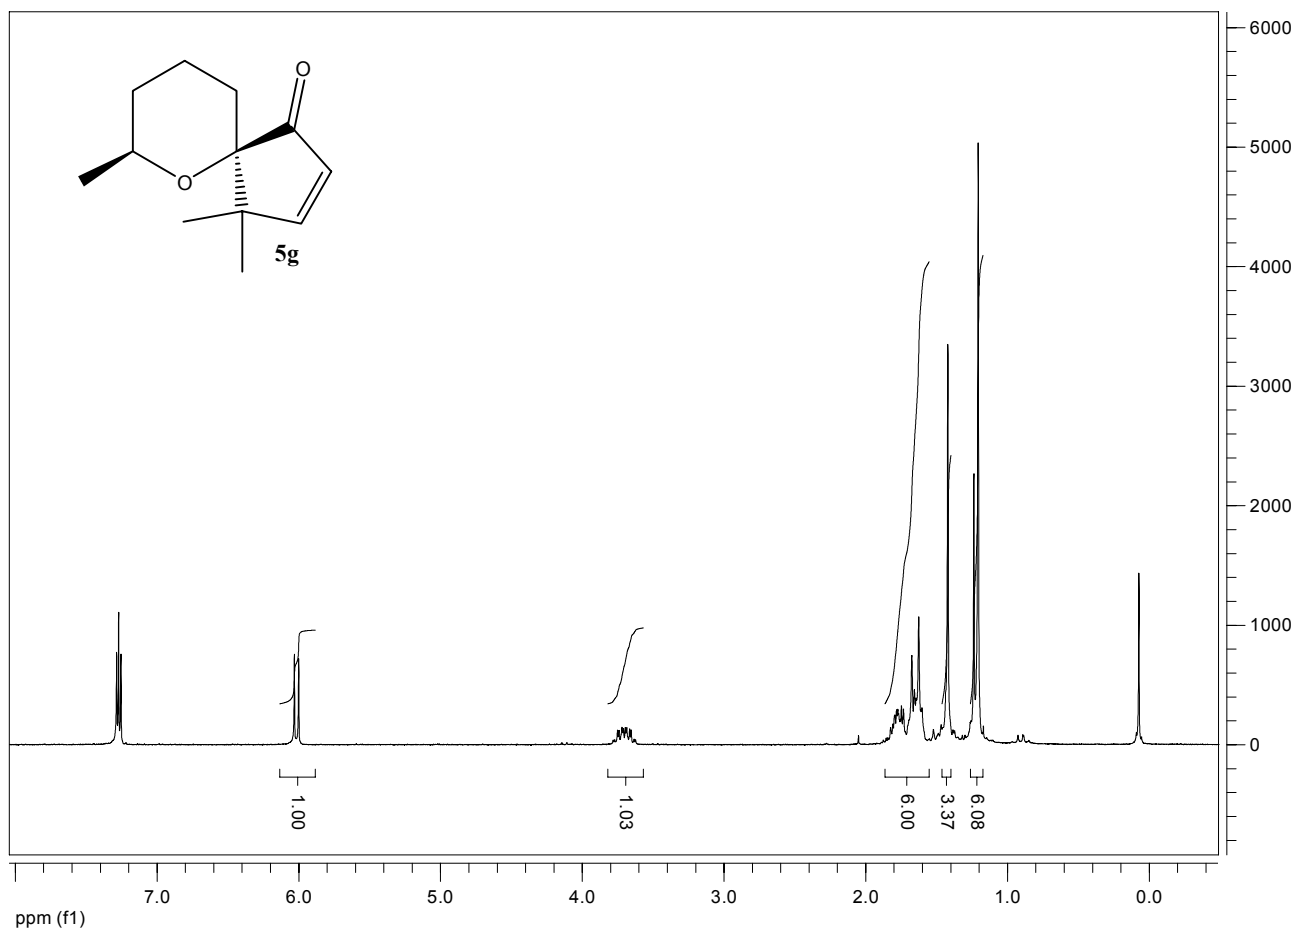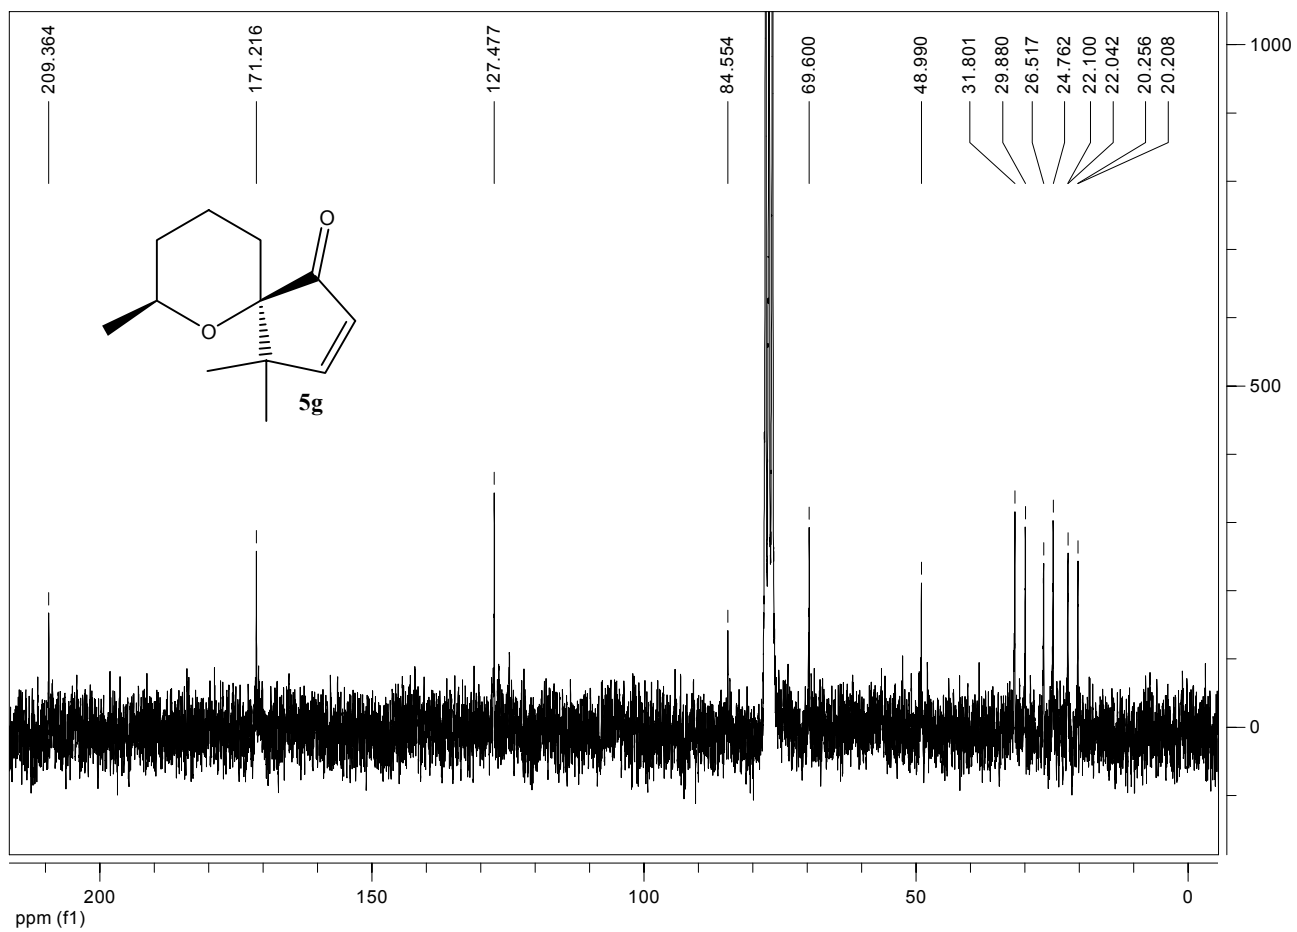

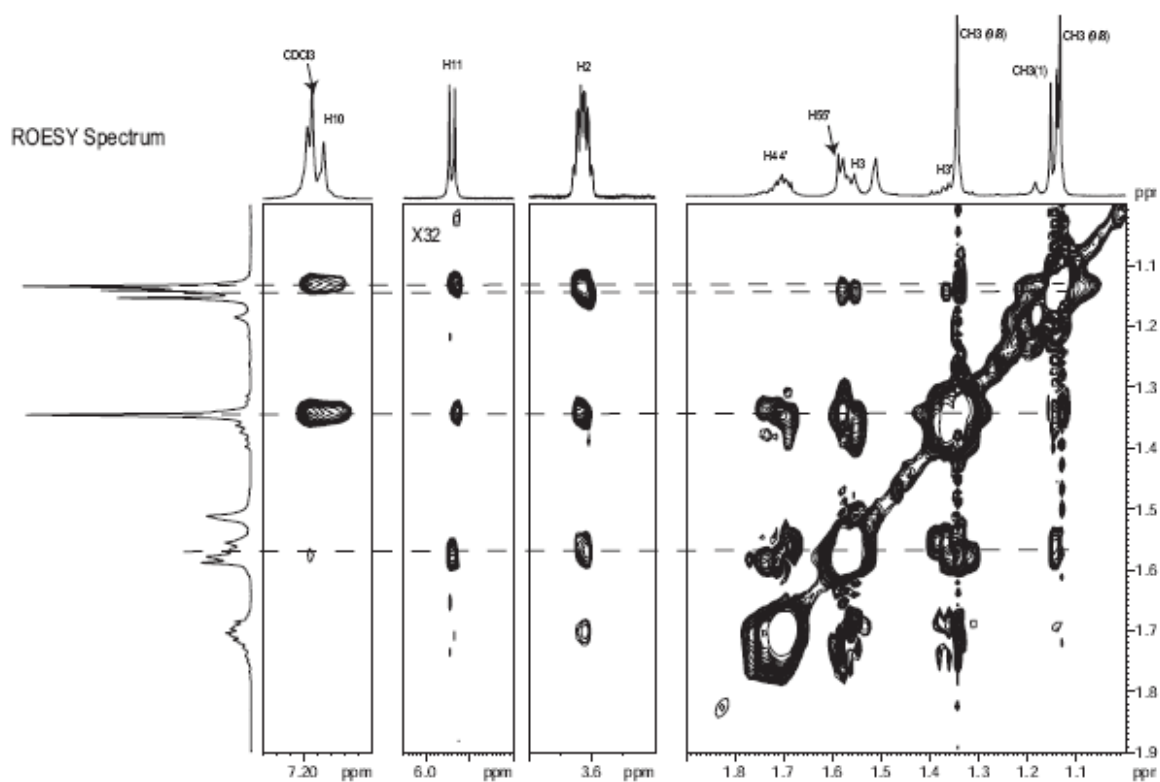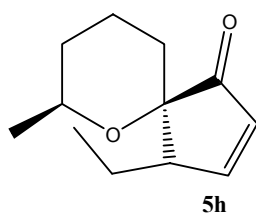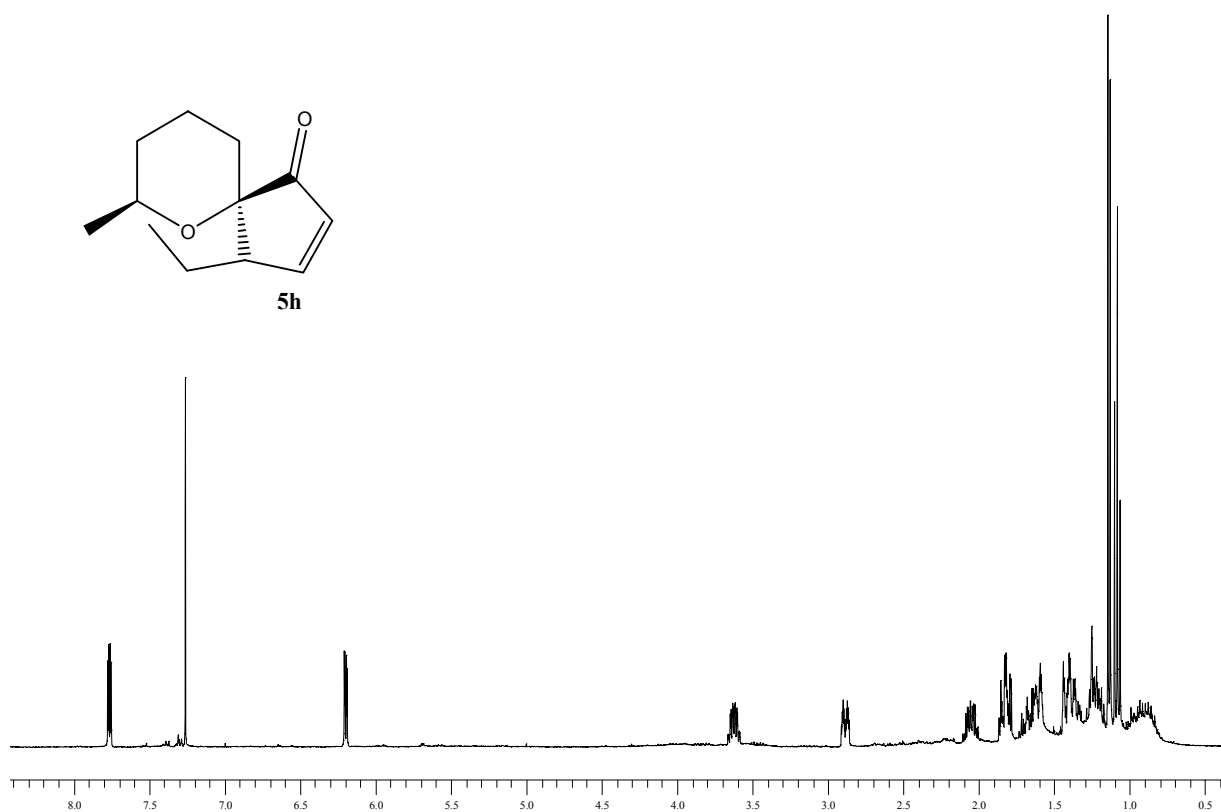

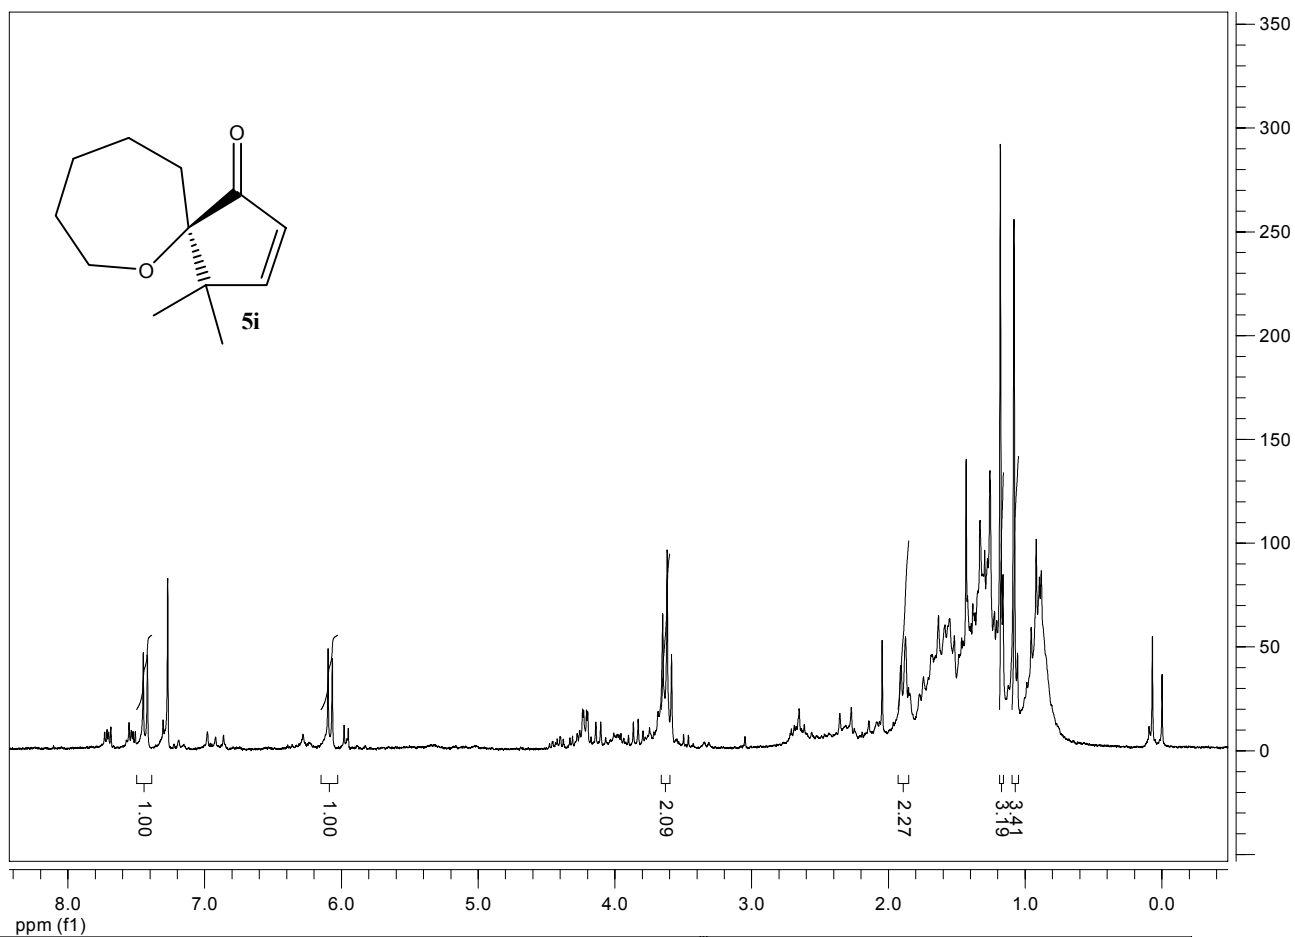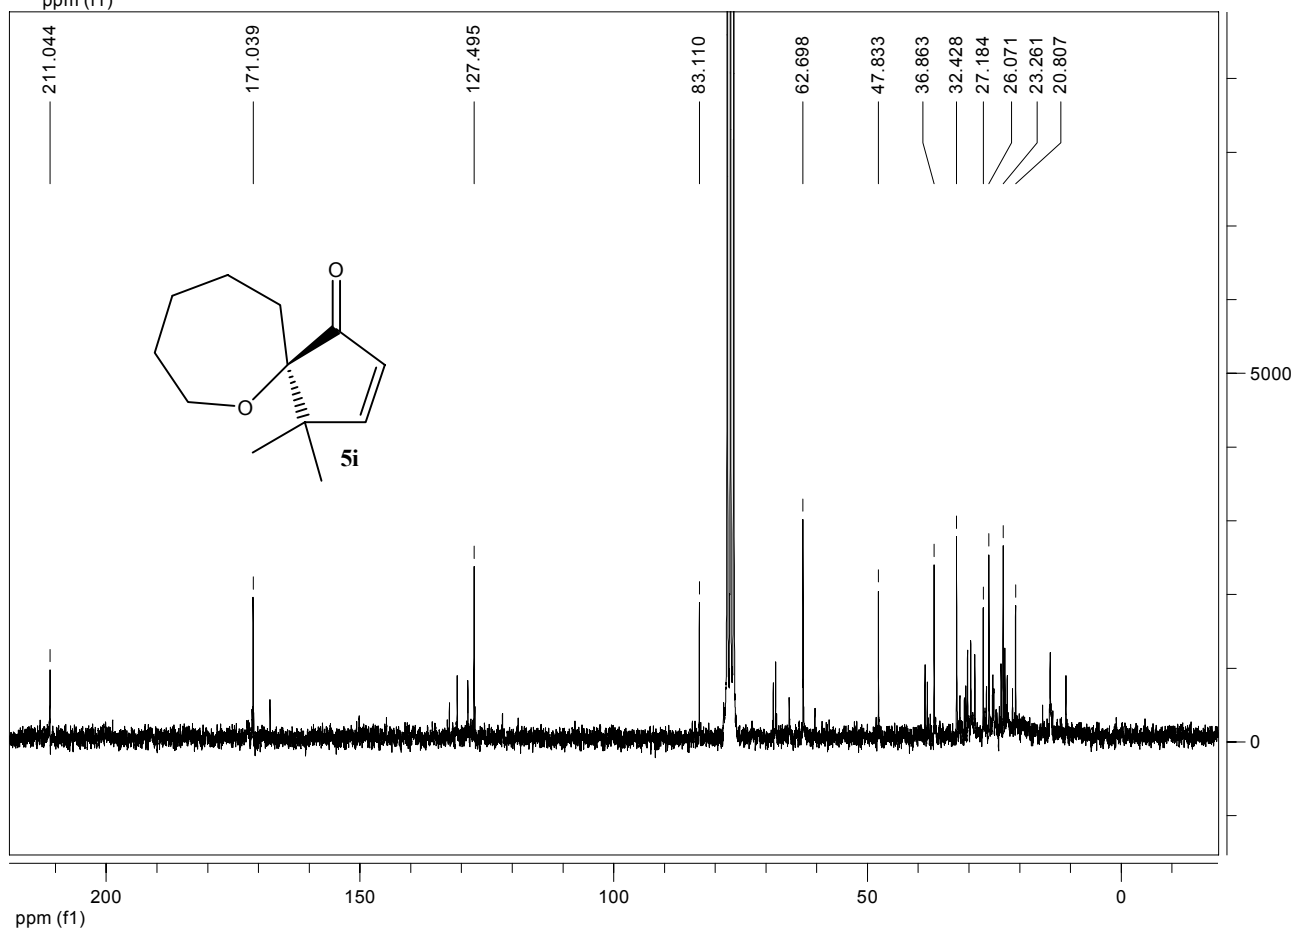

Crystal structure determination - Colorless crystals of 4,4,7-trimethyl-6-oxaspiro[4.5]dec-2-en-1-one by slow evaporation from methanol. Crystal dimensions : 0.5 x 0.5 x 0.1 mm<sup>3</sup>.

Single crystal diffraction data were collected at 100 K, using a Oxford Cryostream low temperature device, on a Oxford Xcalibur CCD area detector diffractometer, using graphite monochromatised Mo K $\alpha$  ( $\lambda$  = 0.71069Å) radiation. Data reduction and absorption correction were performed using CrysAlis RED 1.171.26 (Oxford Diffraction). The structure was solved by direct methods using SIR2004<sup>ii</sup> and refined by full-matrix least squares using SHELX-97.<sup>iii</sup> All hydrogen atoms were located in the electron density map and then refined using isotropic displacement parameters.

The Crystallographic Information File (CIF) has been deposited by the Cambridge Crystallographic Data Centre, with deposition number CCDC 274489.

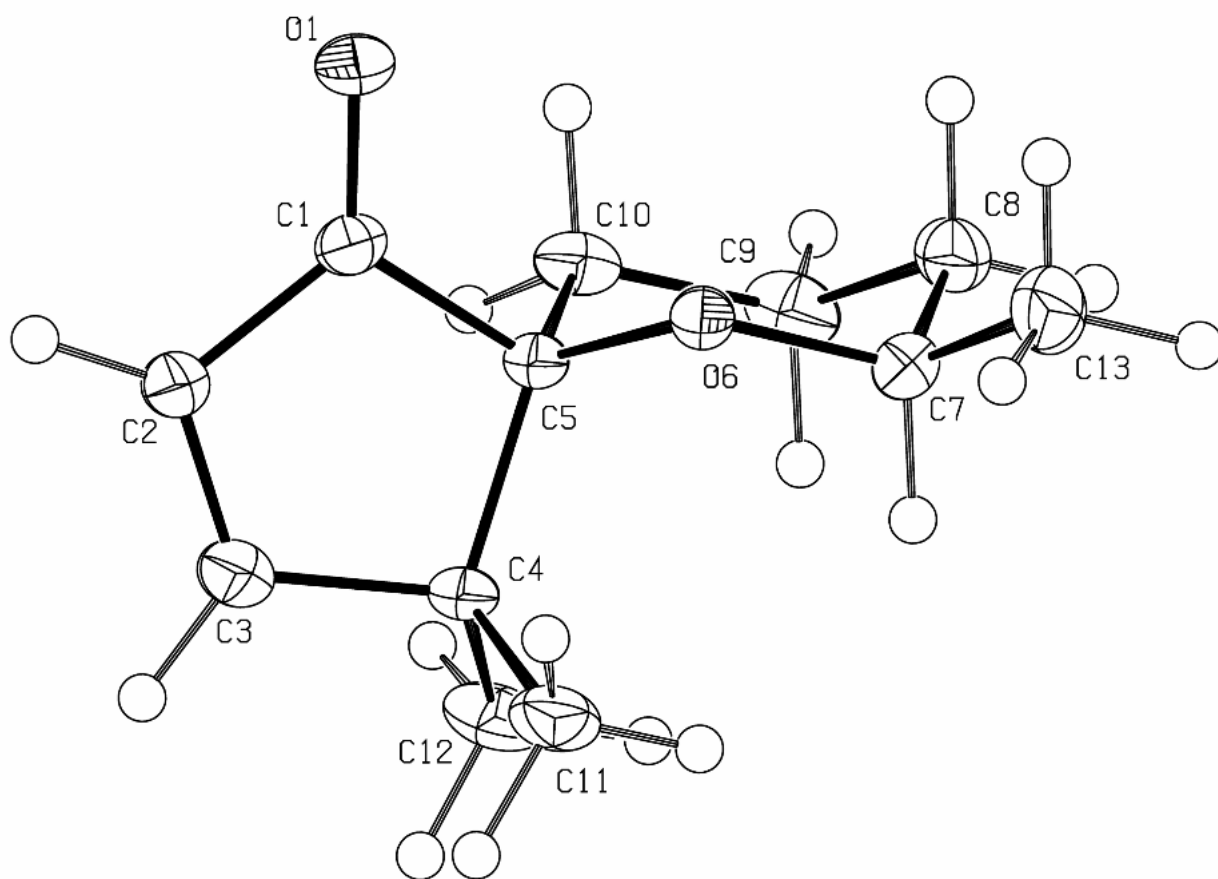

Figure 1. Drawing of the asymmetric unit of 4,4,7-trimethyl-6-oxaspiro[4.5]dec-2-en-1-one, showing the adopted labelling scheme, with atomic displacement ellipsoids drawn at the 50% probability level.



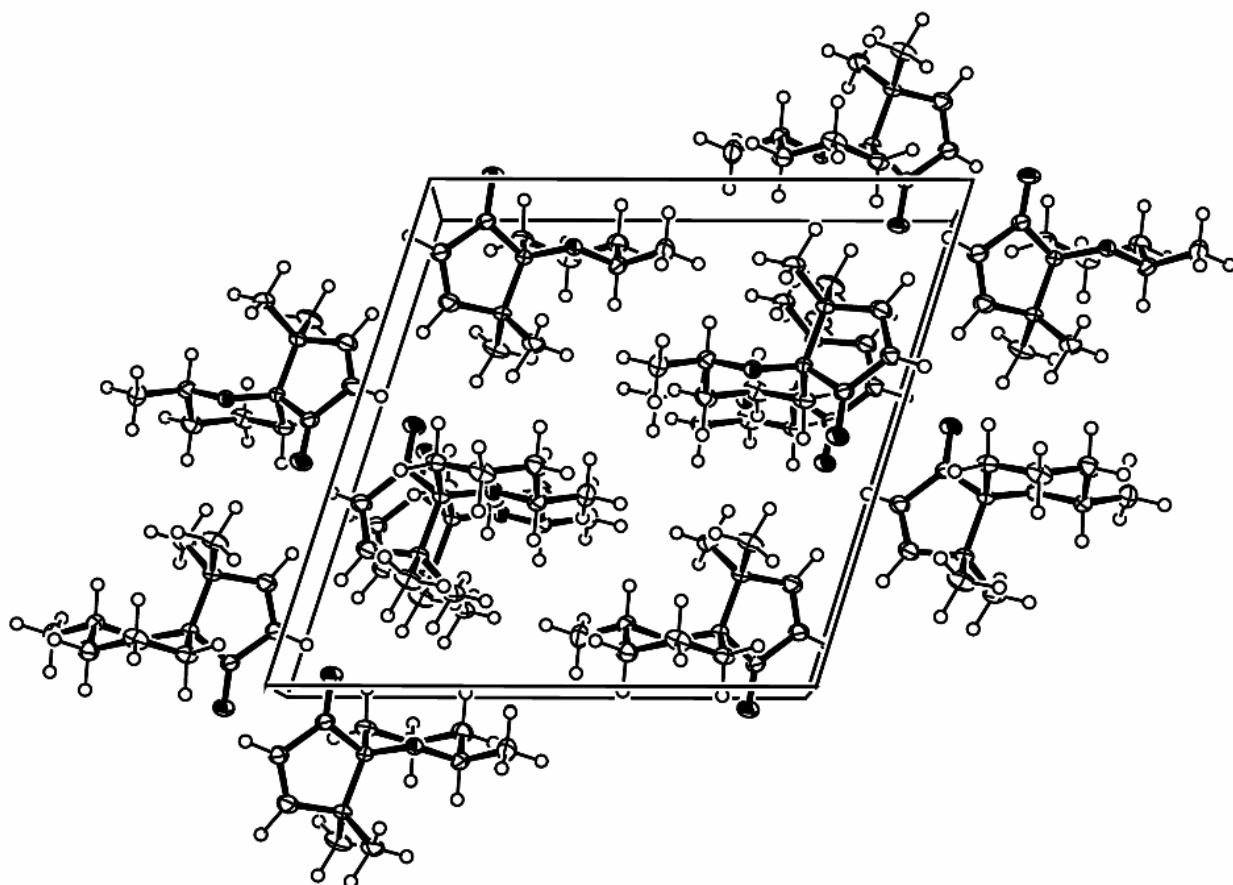

Figure 2. Crystal packing of 4,4,7-trimethyl-6-oxaspiro[4.5]dec-2-en-1-one.

**Table 1.** Crystal data and structure refinement for 4,4,7-trimethyl-6-oxaspiro[4.5]dec-2-en-1-one

|                                |                                                          |
|--------------------------------|----------------------------------------------------------|
| Identification code            | CCDC 274489                                              |
| Empirical formula              | C <sub>13</sub> H <sub>18</sub> O <sub>2</sub>           |
| Formula weight                 | 206                                                      |
| Temperature                    | 100 K                                                    |
| Wavelength                     | 0.71069 Å                                                |
| Crystal system                 | <i>P2<sub>1</sub>/a</i>                                  |
| Space group                    | Monoclinic                                               |
| Unit cell dimensions (Å and °) | a = 13.38(5)<br>b = 6.27(9)<br>c = 13.70<br>β = 107.3(5) |
| Volume (Å <sup>3</sup> )       | 1099                                                     |
| Z                              | 4                                                        |
| Density (calculated)           | 0.799 Mg/m <sup>3</sup>                                  |
| Absorption coefficient         | 0.057 mm <sup>-1</sup>                                   |
| F(000)                         | 296                                                      |

|                                   |                                             |
|-----------------------------------|---------------------------------------------|
| Crystal size                      | 0.5 x 0.5 x 0.1 mm <sup>3</sup>             |
| Theta range for data collection   | 4.45 to 29.43°                              |
| Index ranges                      | -18<=h<=15<br>-8<=k<=8<br>-17<=l<=18        |
| Reflections collected             | 7405                                        |
| Independent reflections           | 2856 [R(int) = 0.0405]                      |
| Completeness to theta = 29.43°    | 93.8 %                                      |
| Refinement method                 | Full-matrix least-squares on F <sup>2</sup> |
| Data / restraints / parameters    | 2856 / 0 / 200                              |
| Goodness-of-fit on F <sup>2</sup> | 1.072                                       |
| Final R indices [I>2sigma(I)]     | R1 = 0.0638, wR2 = 0.1319                   |
| R indices (all data)              | R1 = 0.0965, wR2 = 0.1517                   |
| Largest diff. peak and hole       | 0.309 and -0.247 e.Å <sup>-3</sup>          |

---

[<sup>ii</sup>] M.C. Burla, R. Caliendo, M. Camalli, B. Carrozzini, G.L. Cascarano, L. De Caro, C. Giacovazzo, G. Polidori, R. Spagna Sir2004: an improved tool for crystal structure determination and refinement. J. Appl. Cryst. (2005). **38**, 381-388. Web site: <http://www.ic.cnr.it/>

[<sup>iii</sup>] Programs for Crystal Structure Analysis (Release 97-2). Sheldrick, G.M., Institut für Anorganische Chemie der Universität, Tammanstrasse 4, D-3400 Göttingen, Germany, 1998.; Web site: <http://shelx.uni-ac.gwdg.de/SHELX/>.
